# Supplementary material for: Lipoic Acid-Functionalized Hexanuclear Manganese(III) Nanomagnets Suitable for Surface Grafting
Source: MDPI journal article supplement (doi:10.3390/ijms24108645), 2023-05-12
Supplement: s1 [file s1]

## Supplementary Information (SI)

### Lipoic Acid-Functionalized Hexanuclear Manganese(III) Nanomagnets Suitable for Surface Grafting

Marta Orts-Arroyo, Carlos Rojas-Dotti, Nicolás Moliner and José Martínez-Lillo \*

Departament de Química Inorgànica, Instituto de Ciencia Molecular (ICMol), Universitat de València,

c/Catedrático José Beltrán 2, 46980 Paterna, Spain; marta.orts-arroyo@uv.es (M.O.-A.);

carlos.rojas@uv.es (C.R.-D.); fernando.moliner@uv.es (N.M.)

\*Correspondence: f.jose.martinez@uv.es; Tel.: +34-9635-44460

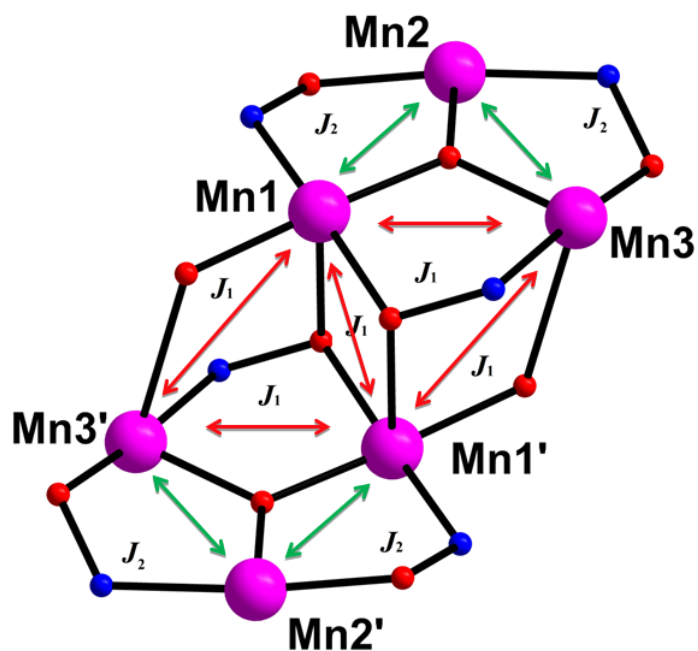

**Figure S1.** The 2- $J$  coupling exchange model used to fit the experimental magnetic data of **1** and **2**.

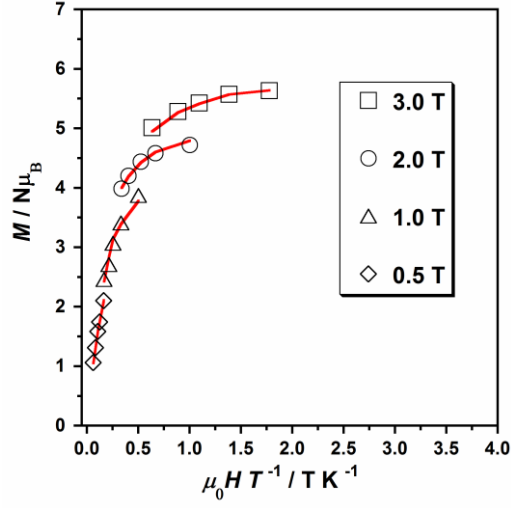

**Figure S2.** Plot of the reduced magnetization ( $M/N\mu_B$  vs  $\mu_0 H/T$ ) at the indicated dc fields and temperatures 2–7 K for **1**. The solid lines represent the best fit of the experimental data [ $S = 4$ ,  $g = 1.99$  and  $D = -0.75$   $\text{cm}^{-1}$ ].

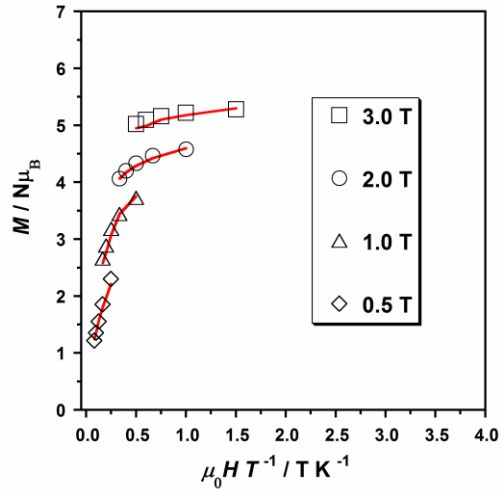

**Figure S3.** Plot of the reduced magnetization ( $M/N\mu_B$  vs  $\mu_0 H/T$ ) at the indicated dc fields and temperatures 2–7 K for **2**. The solid lines represent the best fit of the experimental data [ $S = 4$ ,  $g = 1.99$  and  $D = -0.92$   $\text{cm}^{-1}$ ].
